# Supplementary material
Source: PubMed Central journal article supplement (PMC2553113)
Supplement: 108.130179_1.pdf [file 108.130179_1.pdf]

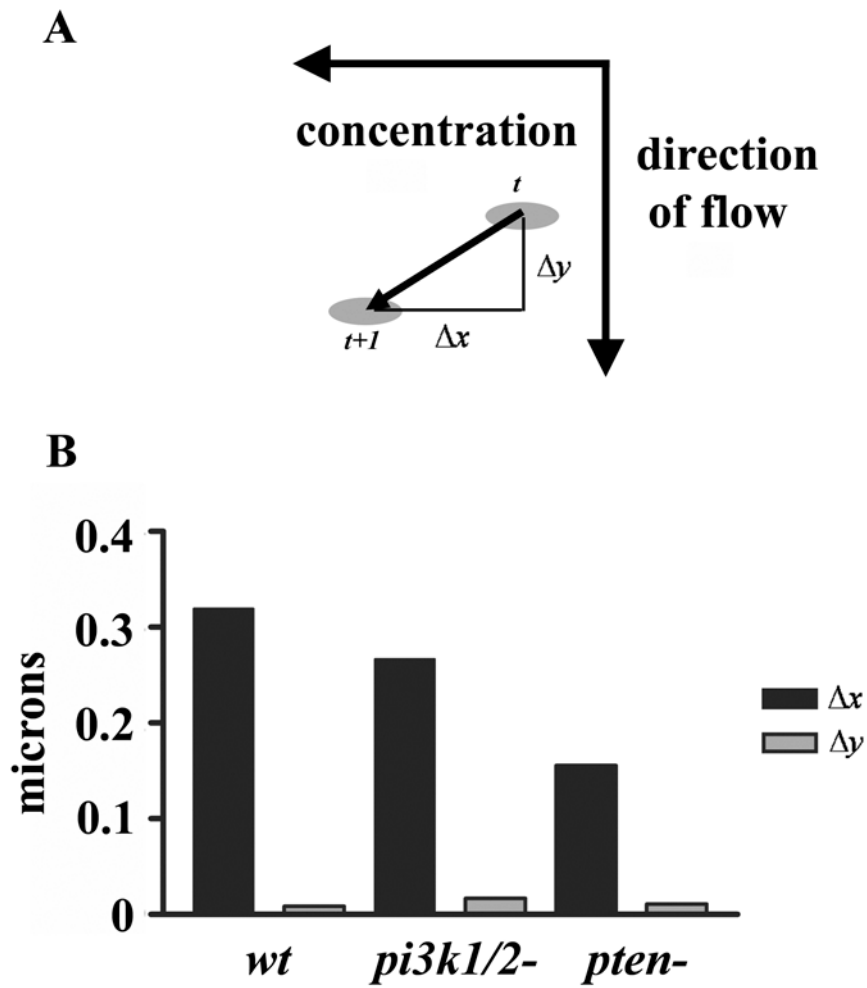

Figure S1. Comparison of the magnitude of movement in the direction of the gradient with movement in the direction of the flow. A) Diagram detailing the geometry used in the measurements. Positive displacements are in the direction of the gradient or flow. B) Mean displacements in the direction of the gradient and flow for the three cell lines in the study.

Table S1. Regression coefficients\*

|                            | coefficient | pipette | microfluidic device |
|----------------------------|-------------|---------|---------------------|
| <b>accuracy</b>            |             |         |                     |
| <i>wt</i>                  |             |         |                     |
|                            | $b_0$       | 0.5108  | 0.2311              |
|                            | $b_1$       | -0.0011 | 0.0007              |
| <i>pi3k1/2<sup>-</sup></i> |             |         |                     |
|                            | $b_0$       | 0.3932  | 0.5154              |
|                            | $b_1$       | -0.0013 | -0.0005             |
| <i>pten<sup>-</sup></i>    |             |         |                     |
|                            | $b_0$       | 0.3266  | 0.3107              |
|                            | $b_1$       | -0.0006 | -0.0001             |
| <b>speed</b>               |             |         |                     |
| <i>wt</i>                  |             |         |                     |
|                            | $b_0$       | 9.6728  | 10.4912             |
|                            | $b_1$       | -0.0124 | -0.0013             |
| <i>pi3k1/2<sup>-</sup></i> |             |         |                     |
|                            | $b_0$       | 6.6665  | 15.4912             |
|                            | $b_1$       | -0.0036 | -0.0170             |
| <i>pten<sup>-</sup></i>    |             |         |                     |
|                            | $b_0$       | 5.9706  | 14.0759             |
|                            | $b_1$       | -0.0022 | -0.0281             |
| <b>coordination index</b>  |             |         |                     |
| <i>wt</i>                  |             |         |                     |
|                            | $b_0$       | 6.6036  | 2.6837              |
|                            | $b_1$       | -0.0144 | 0.0113              |
| <i>pi3k1/2<sup>-</sup></i> |             |         |                     |
|                            | $b_0$       | 4.3792  | 8.1984              |
|                            | $b_1$       | -0.0138 | -0.0102             |
| <i>pten<sup>-</sup></i>    |             |         |                     |
|                            | $b_0$       | 3.3903  | 5.0617              |
|                            | $b_1$       | -0.0053 | -0.0069             |

\*The coefficients are from the fit of the data to the equation  $y = b_0 + b_1d$ , where  $y$  is either accuracy, speed, or coordination and  $d$  is the distance from the highest

concentration in the assay. The units for  $b_0$  and  $b_1$  vary for each motility variable. For accuracy, the chemotactic index is unitless so  $b_0$  is unitless and  $b_1$  is  $\mu\text{m}^{-1}$ . For speed and the coordination index, the units for  $b_0$  and  $b_1$  are  $\mu\text{ms}/\text{min}$  and  $\text{min}^{-1}$ , respectively.
